# Supplementary material
Source: Springer Nature journal article supplement (https://www.springermedizin.de/resource/supplementary/40170_2013_18_MOESM9_ESM.pdf/25787602)

**A****D-[1,6-<sup>13</sup>C<sub>2</sub>] glucose****[3-<sup>13</sup>C] pyruvate****[3-<sup>13</sup>C] lactate**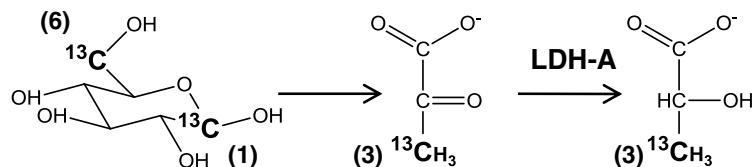**B****SNU398****HEPG2**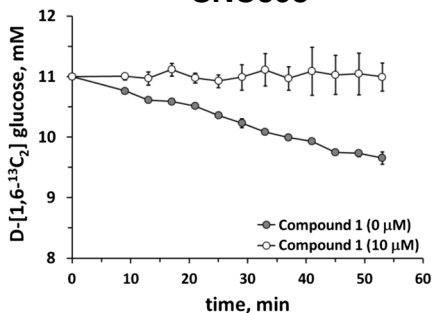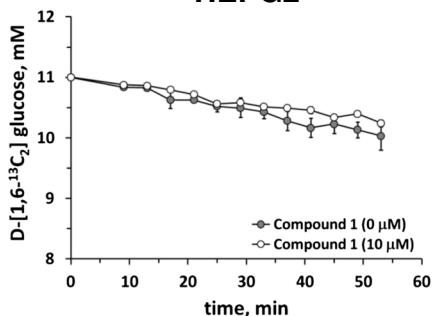**SNU398****HEPG2**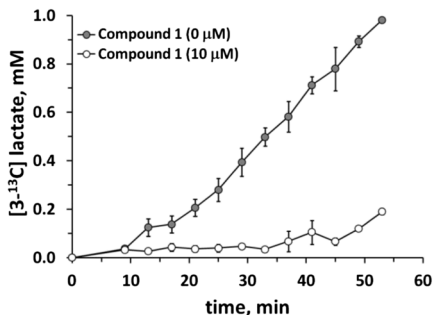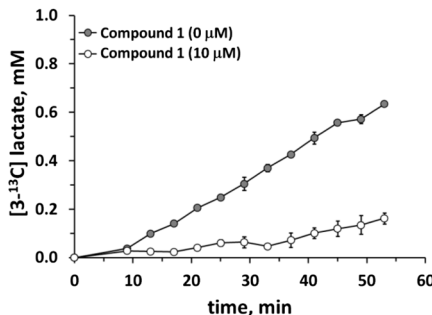

Supplement: MOESM9 [file 25787602]
